# Supplementary material
Source: Springer Nature journal article supplement (https://www.springermedizin.de/resource/supplementary/12968_2009_530_MOESM3_ESM.pdf/9579190)

# Interval Plot for 16 LV segments

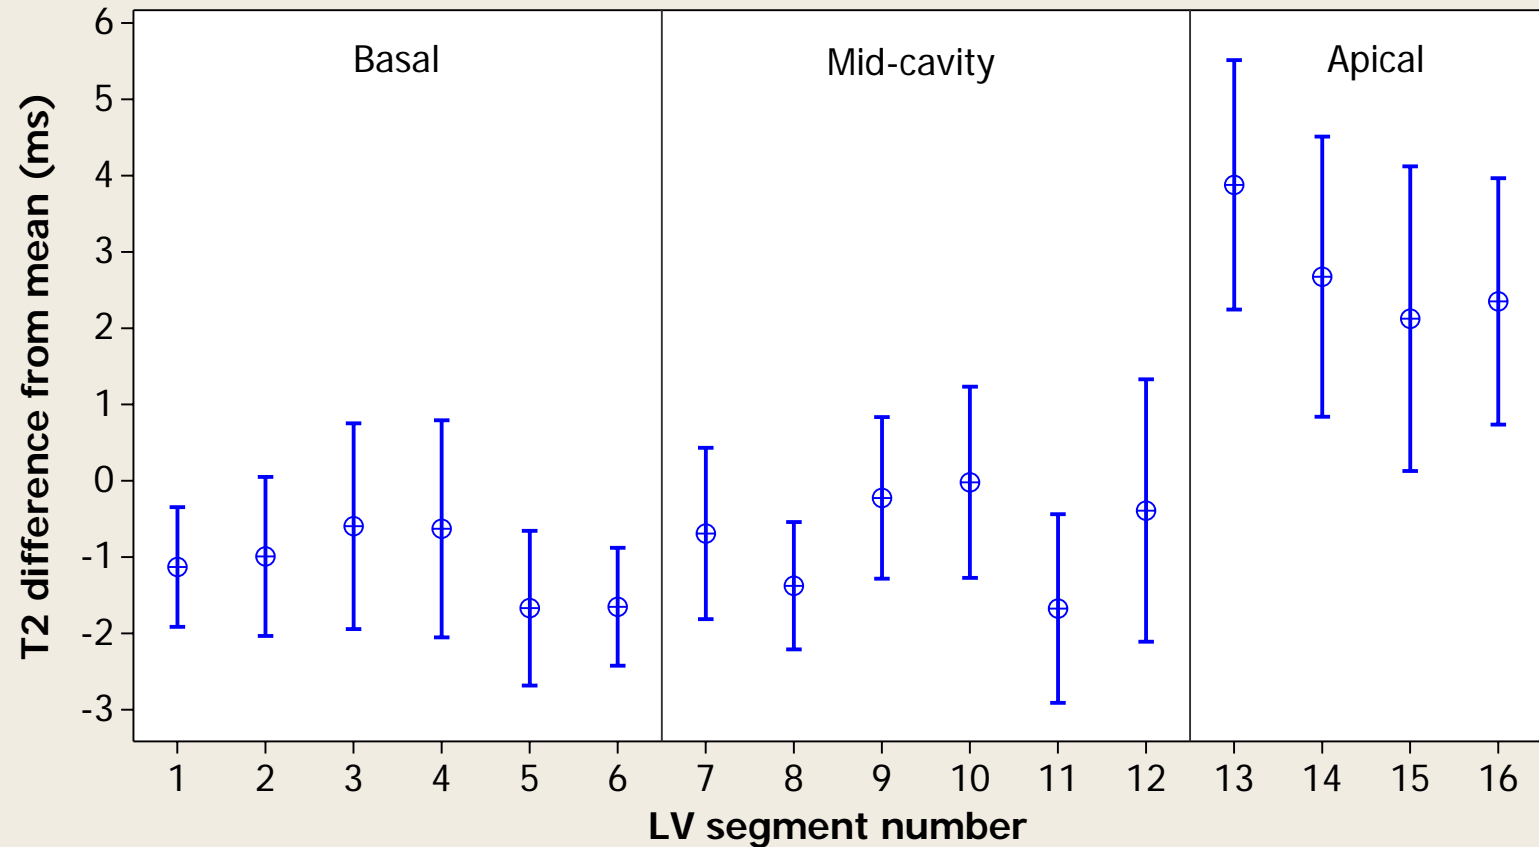

Supplement: MOESM3 [file 9579190]
